# Supplementary material for: Human cytomegalovirus microRNAs are carried by virions and dense bodies and are delivered to target cells
Source: J Gen Virol. 2017 Jun 5;98(5):1058–72. doi: 10.1099/jgv.0.000736 (PMC5656795; doi:10.1099/jgv.0.000736)

## SUPPLEMENTAL FIGURE LEGENDS

**Fig. S1. Characterization of virion and DBs** (a) A brief flow chart of experiments. (b) Virions and DBs were purified from RNase-ONE treated virus stocks, dialyzed and treated with micrococcal nuclease; DNA was extracted and quantified, the purity of DNA is the estimated from the OD values obtained at 260/280 nm. OD, optical density. (c) RNA was isolated from purified virions and DBs, while during the RNA extraction columns were treated with Dnase-I. OD, optical density. (d) Mean Ct values of gB Taqman assays of viral stocks, virions, DBs, and mock samples (used during the WHO standards estimation of copy numbers); DNA from uninfected and infected MRC-5 cells were used as assay controls, analysed data is shown in Fig 1e. Values are mean  $\pm$  SEM of three experiments performed in triplicate.

**Fig. S2. Taqman PCR mean Ct values of various RNA transcripts found in HCMV virions and DBs.** Virions and DBs were purified from RNase-ONE treated virus stocks, dialyzed and treated with micrococcal nuclease, and RNA was extracted; during the RNA extraction column was treated with Dnase-I. cDNA reactions were made with or without reverse transcriptase and TaqMan assays were performed. (a) Presence of viral IE RNA transcripts, (b) long noncoding RNA 2.7 transcripts, (c) cellular beta-2-microglobulin transcripts in virions and DBs. Values are mean  $\pm$  SEM of three experiments performed in triplicate. RT, reverse transcriptase.

**Fig. S3. miRNA taqman assays of RNA obtained from virions and DBs, and transfer of viral RNAs from particles to target host cells** (a) Mean Ct values of host cell miRNAs, analysed data is shown in fig. 4b and (b) HCMV miRNAs in purified virions, DBs and mock-infected and HCMV infected cells analysed data is shown in fig. 5. (c) Fold change of HCMV miRNA levels in purified virions, DBs, and mock-infected and HCMV infected cells, analysed data is shown in fig. 5. (d) Transferred lncRNA 2.7 in cells treated with UV-irradiated virions or DBs or with viral stock or mock samples. (e) Mean Ct values of

25 transferred HCMV miRNAs; host RNU48 served as an endogenous control, analysed data is  
26 shown in fig. 6b. Values are mean  $\pm$  SEM of three experiments performed in triplicate.

# Figure S1

**a**

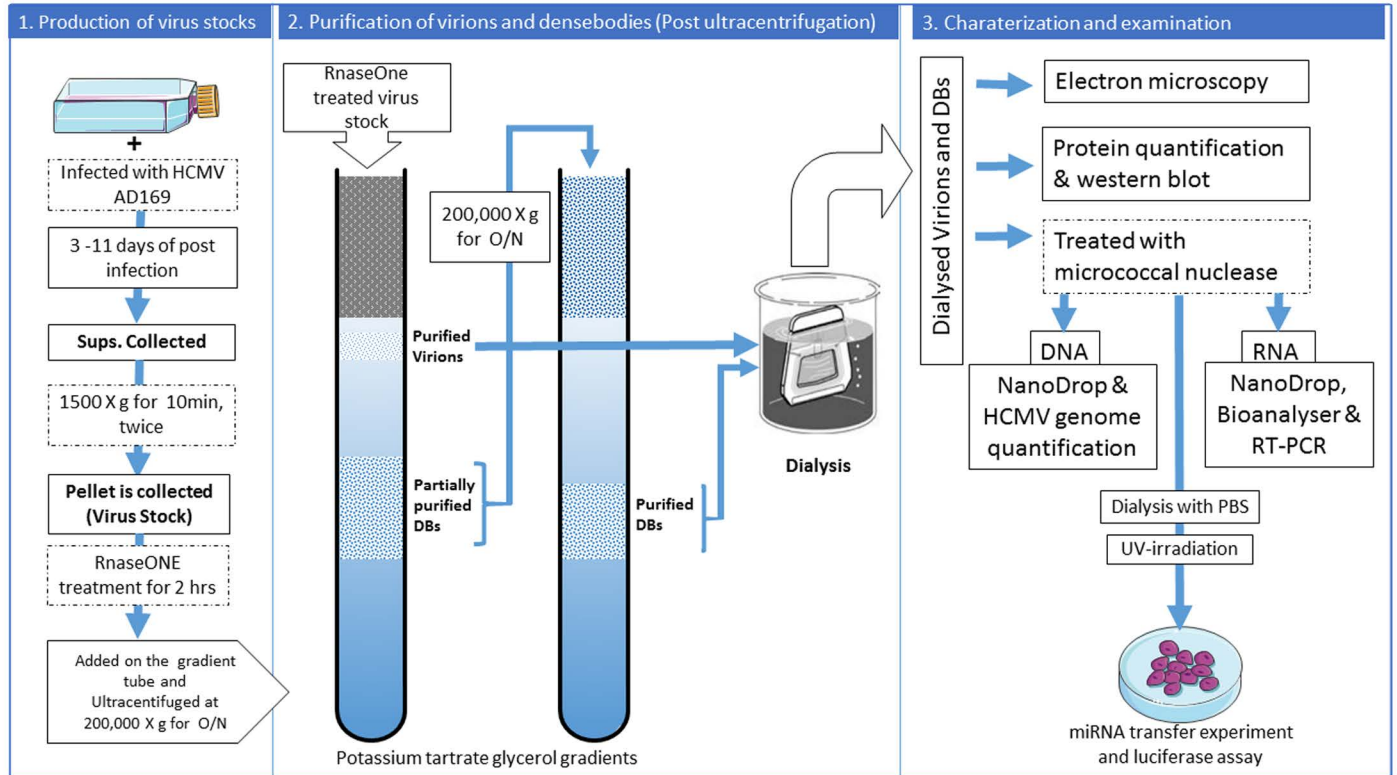

**b**

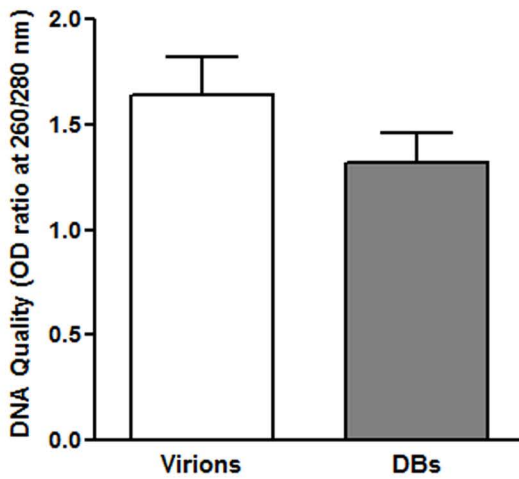

**c**

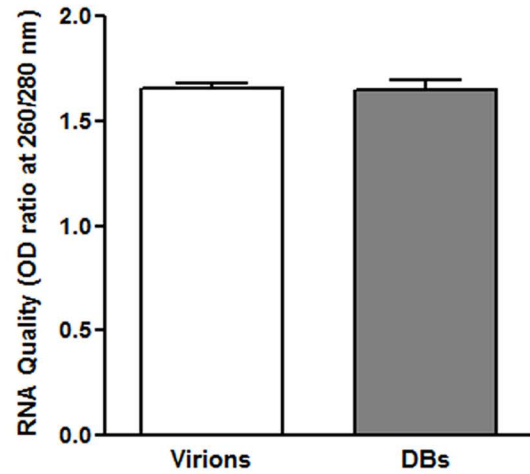

**d**

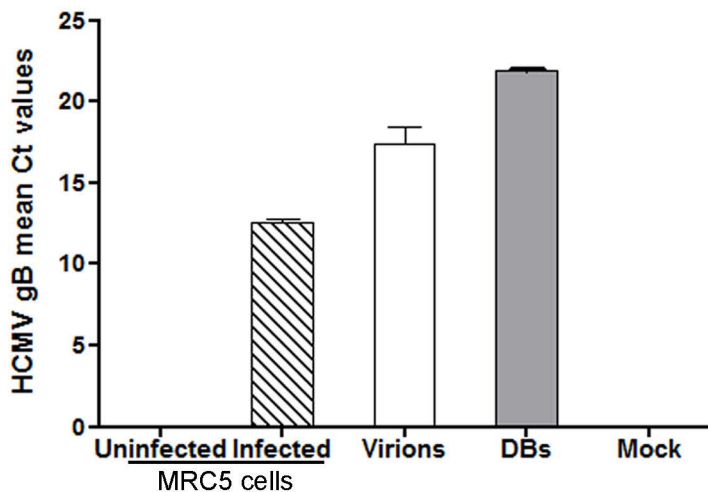

Figure S2

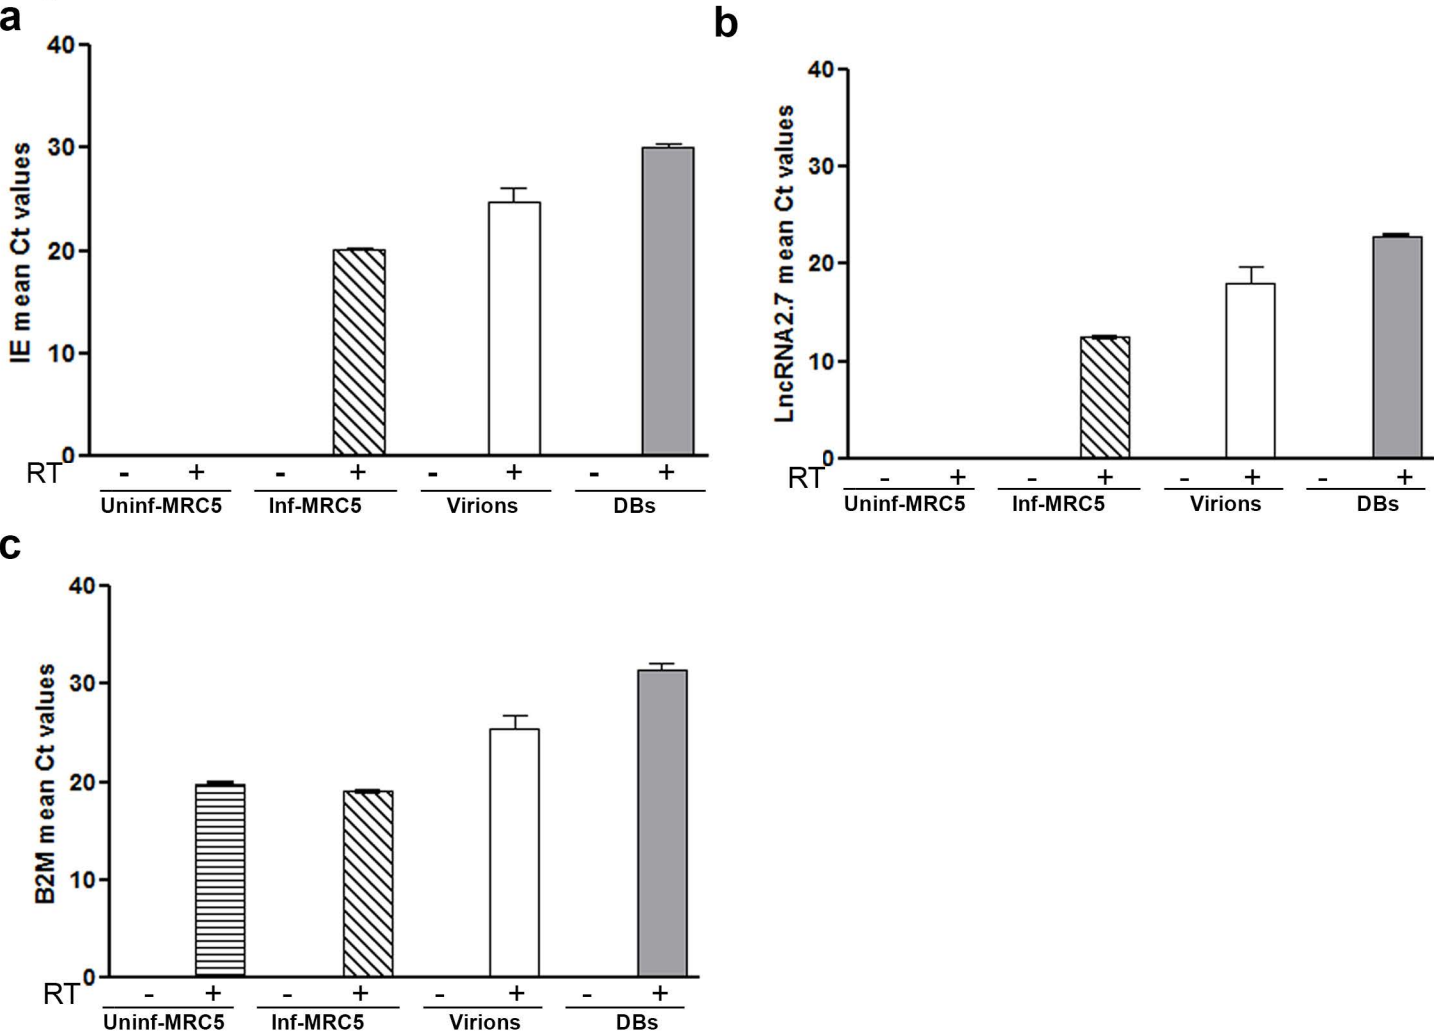

Figure S3

a

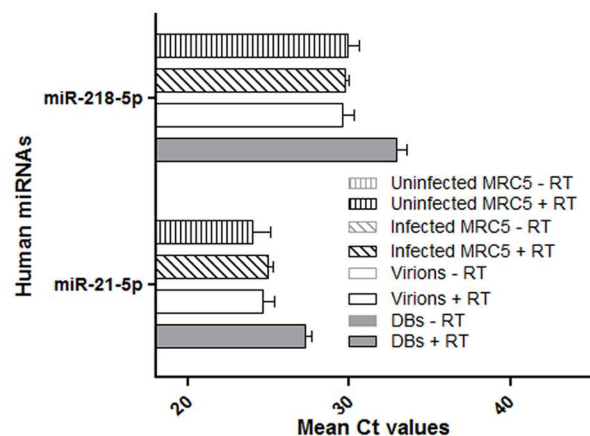

b

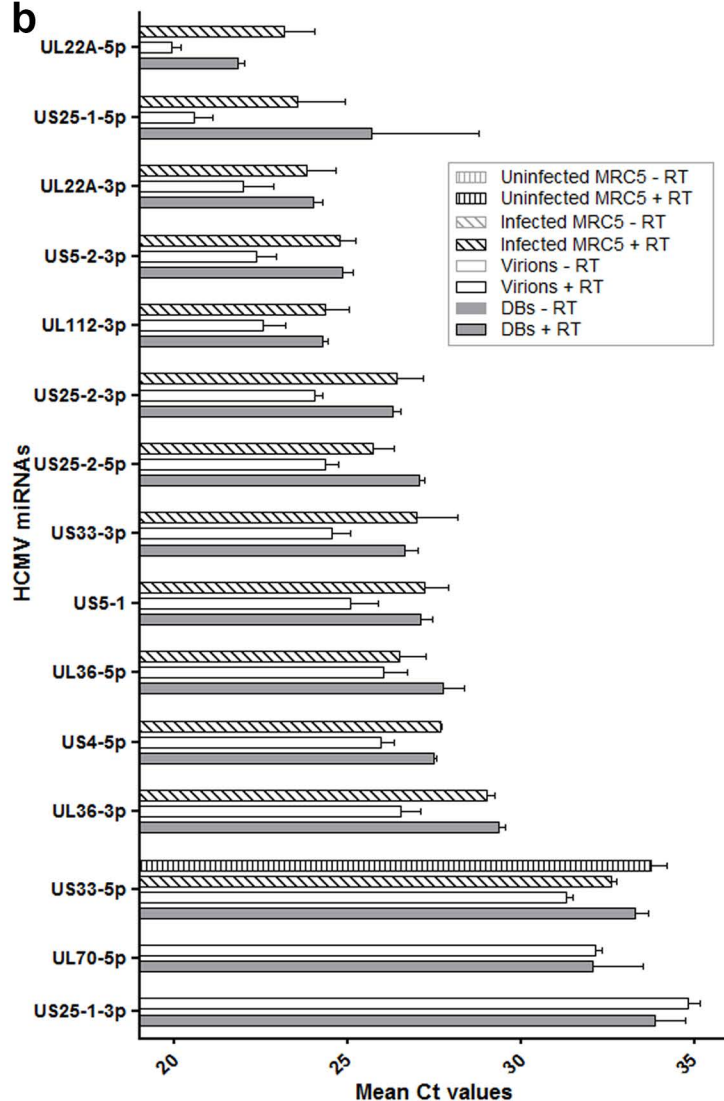

c

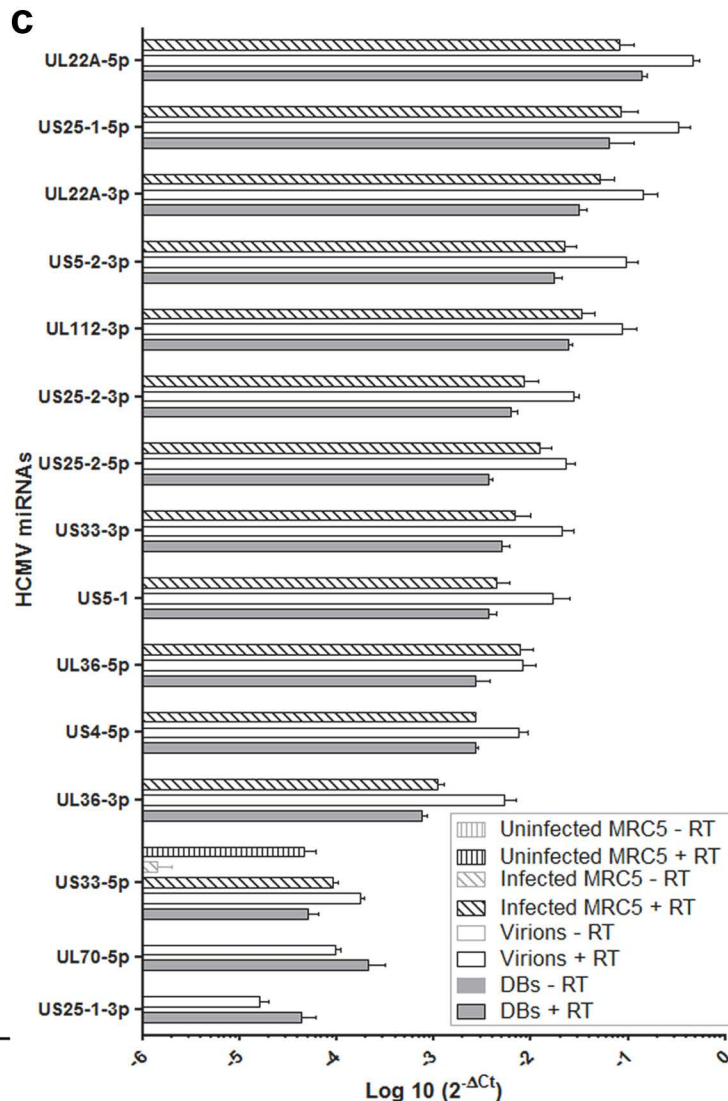

d

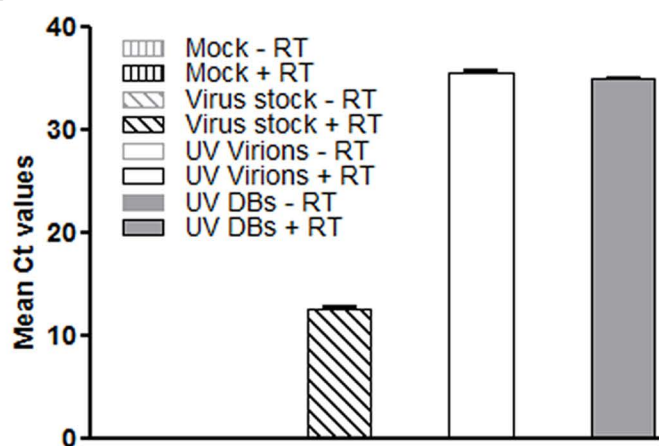

e

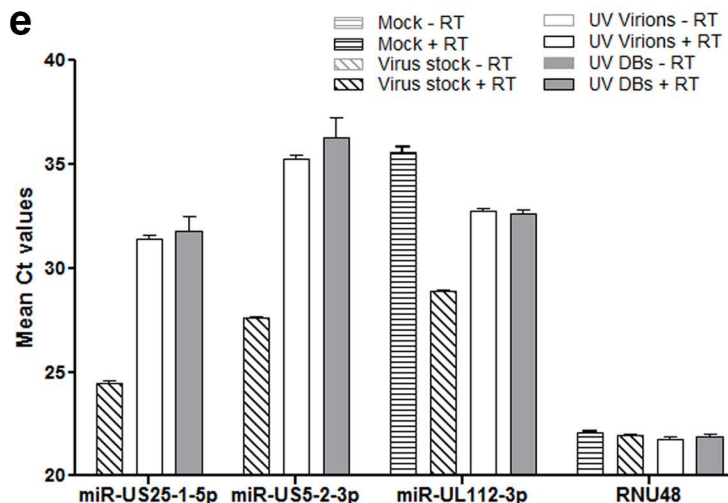

Supplement: Supplementary File 1 [file jgv-98-1058-s001.pdf]
